# Supplementary material
Source: publisher figshare collection journal article supplement (https://acs.figshare.com/ndownloader/files/17726438)
Supplement: Supplementary file 1 [file 17726438]

# Monitoring the Formation of Amyloid Oligomers Using Photoluminescence Anisotropy

Bo Jiang,<sup>†</sup> Amir Aliyan,<sup>†,Φ</sup> Nathan P. Cook,<sup>‡</sup> Andrea Augustine,<sup>†</sup> Ghibom Bhak,<sup>Ψ</sup> Rodrigo Maldonado,<sup>†</sup> Ashleigh D. Smith McWilliams,<sup>†</sup> Erick M. Flores,<sup>Ξ</sup> Nicolas Mendez,<sup>‡</sup> Mohammad Shahnawaz,<sup>‡</sup> Fernando J. Godoy,<sup>Ξ</sup> Javier Montenegro,<sup>Ψ</sup> Ines Moreno-Gonzalez,<sup>‡,Θ</sup> Angel A. Martí<sup>†,Δ,§,\*</sup>

<sup>†</sup>Department of Chemistry, <sup>Δ</sup>Bioengineering and <sup>§</sup>Materials Science & Nanoengineering Rice University, Houston, Texas 77005. <sup>Φ</sup>Pasargad Institute for Advanced Innovative Solutions, & Khatam University, Tehran, Iran. 1991633361

<sup>‡</sup>Department of Chemistry, Williams College, Williamstown, MA 01267. <sup>Ψ</sup>Centro Singular de Investigación en Química Biolóxica e Materiais Moleculares (CIQUS), Departamento de Química Orgánica, Universidade de Santiago de Compostela, 15782 Santiago de Compostela, <sup>Ξ</sup>Departamento de Química de los Materiales, Facultad de Química y Biología, Universidad de Santiago de Chile, Av. Libertador B. O'Higgins, 3363, Santiago Chile. <sup>Δ</sup>Mitchell Center for Alzheimer's disease and Related Brain Disorders, Department of Neurology, The University of Texas Health and Science Center at Houston, Houston, TX 77030. <sup>Θ</sup>Dpto. Biología Celular, Genética y Fisiología, Instituto de Investigación Biomedica de Málaga-IBIMA, Facultad de Ciencias, Universidad de Málaga, Spain and Centro de Investigación Biomedica en Red sobre Enfermedades Neurodegenerativas (CIBERNED), Madrid, Spain.

## 1. Supplementary Figures

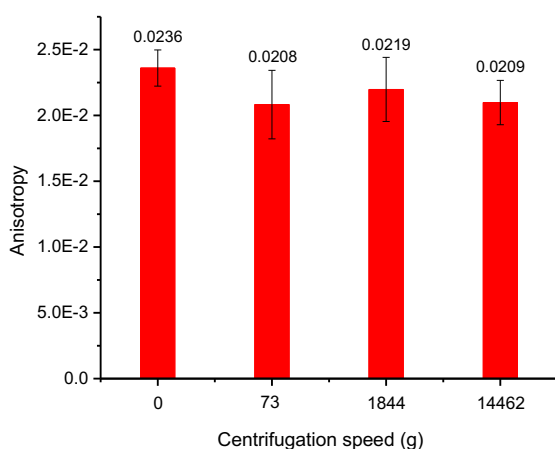

**Figure S1.** Anisotropy of  $[\text{Ru}(\text{bpy})_2(\text{dpqp})]^{2+}$  with  $\text{A}\beta$  oligomers incubated for 72 h at room temperature subjected to different centrifugation speeds. Increasing centrifugation speed from 73 to 14462g does not significantly affect the anisotropy.

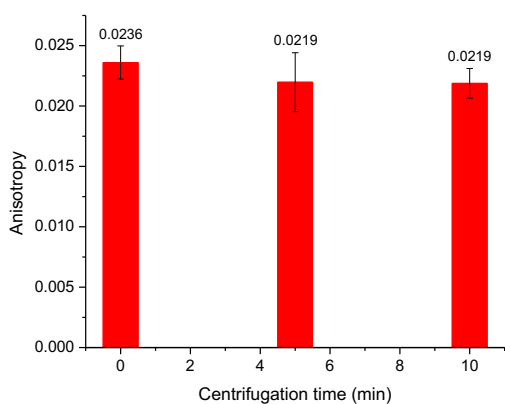

**Figure S2.** Anisotropy of  $[\text{Ru}(\text{bpy})_2(\text{dpqp})]^{2+}$  with  $\text{A}\beta$  oligomers incubated for 72 h at room temperature and centrifuged at 1844g for different times intervals (0, 5 and 10 minutes). The results indicate that increasing the centrifugation time from 5 to 10 minutes does not have a marked effect in the anisotropy.

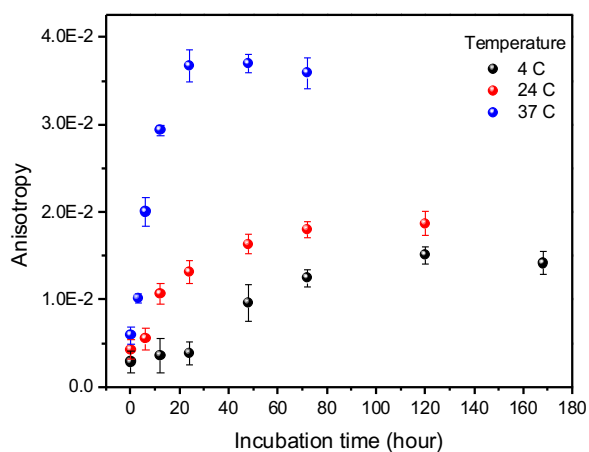

**Figure S3.** Monitoring the formation of  $\text{A}\beta$  oligomers at different temperatures using the photoluminescence anisotropy of  $[\text{Ru}(\text{bpy})_2(\text{dpqp})]^{2+}$ .

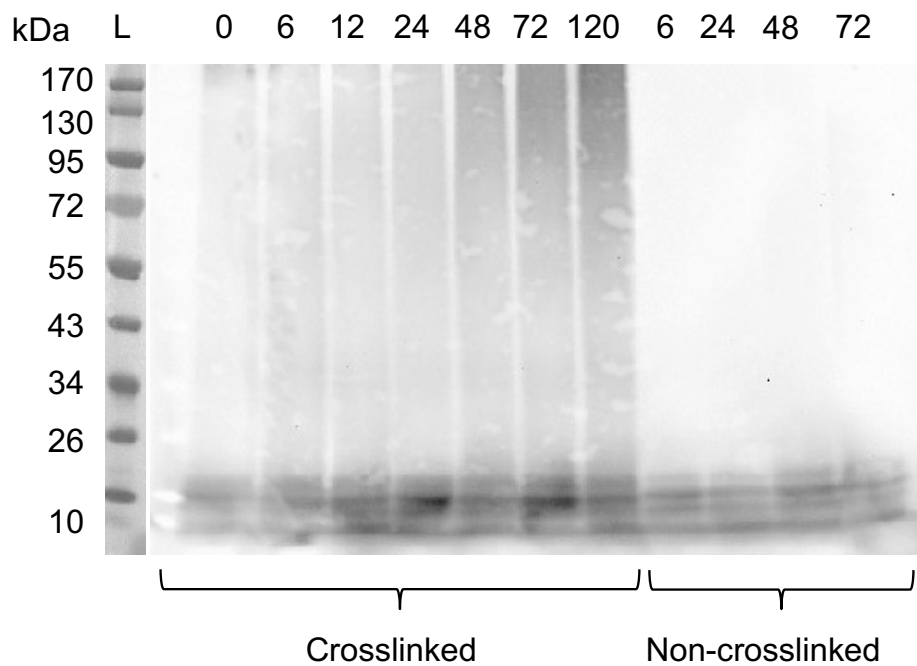

**Figure S4.** Western-Blot of Aβ oligomers crosslinked with glutaraldehyde. The samples were heated at 70°C before putting them in the wells.

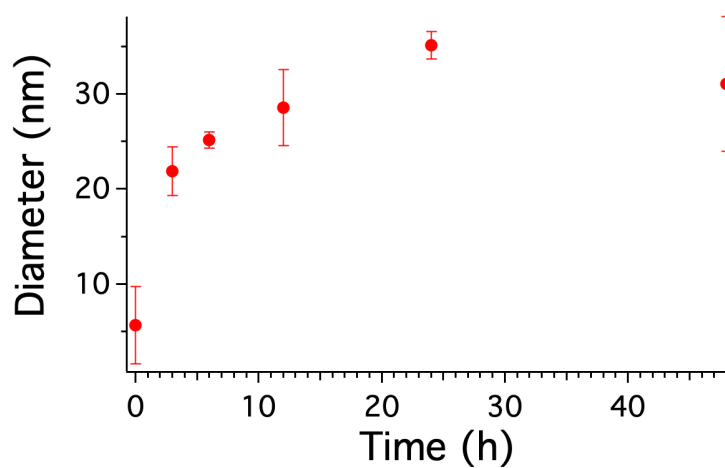

**Figure S5.** Determination of the size of Aβ oligomers using dynamic light scattering (DLS).

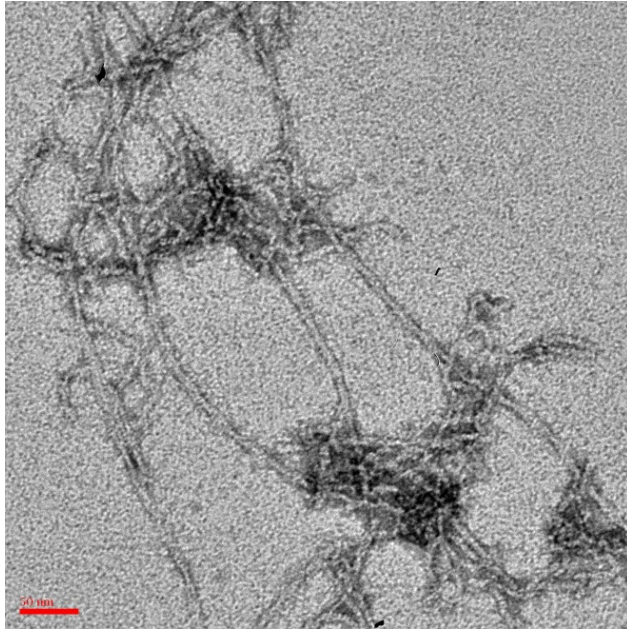

**Figure S6.** A $\beta$  straight fibrils formed after incubation of the 72h mixture at 600 rpm and 37 °C. Long fibrils can be seen together with short curved fibrils formed during the quiescent incubation. Scale bar = 50 nm.

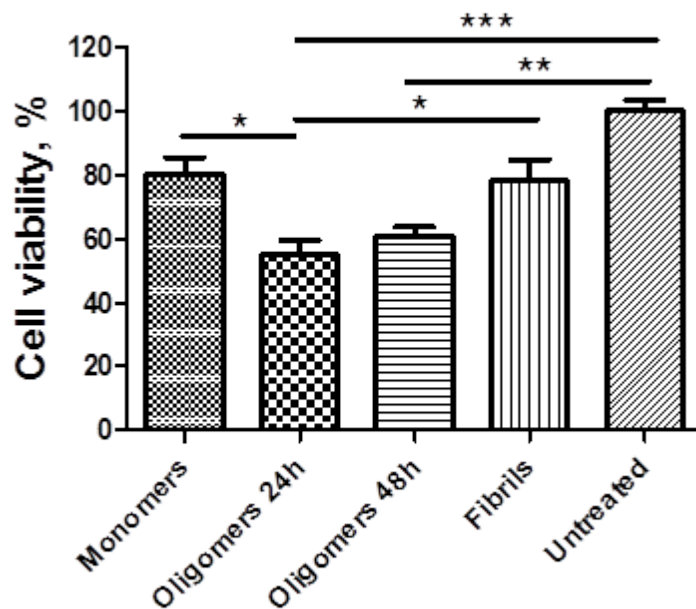

**Figure S7.** A $\beta$  neurotoxicity assay. N2a cells were incubated for 24 h with A $\beta$  in different conformations and cell viability was measured using MTT. Values and error bars are average and standard deviation of three measurements. The data was analyzed by one way ANOVA ( $p=0.0005$ ), Tukey's post hoc test (\* $p<0.05$ , \*\* $p<0.01$ , \*\*\* $p<0.001$ ).

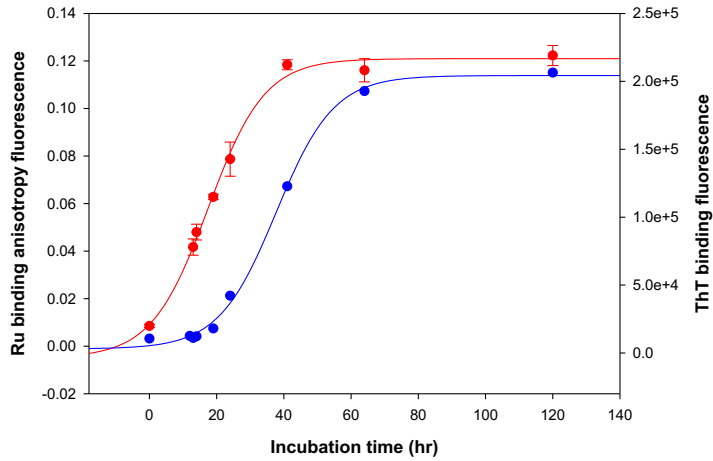

**Figure S8.** Real-time monitoring of  $\alpha$ S oligomers using photoluminescence anisotropy of  $[\text{Ru}(\text{bpy})_2(\text{dpqp})]^{2+}$  (red circles) and the emission of ThT (blue circles).

#### Appendix 1. Derivation of Equation 4

We start by rewriting equation 3 as:

$$r = f_f r_f + f_b r_b \quad (\text{S1})$$

where  $r_f$  and  $r_b$  are the anisotropy of free and bound  $[\text{Ru}(\text{bpy})_2(\text{dpqp})]^{2+}$  respectively, and  $f_f$  and  $f_b$  are the fractional intensity of free and bound  $[\text{Ru}(\text{bpy})_2(\text{dpqp})]^{2+}$  respectively. Assuming that the quantum yield of  $[\text{Ru}(\text{bpy})_2(\text{dpqp})]^{2+}$  does not change significantly in the two different environments then:

$$f_f = \frac{[\text{Ru}_f]}{[\text{Ru}_f] + [\text{Ru}_b]} = \frac{[\text{Ru}_f]}{[\text{Ru}]} \quad (\text{S2})$$

$$f_b = \frac{[\text{Ru}_b]}{[\text{Ru}_f] + [\text{Ru}_b]} = \frac{[\text{Ru}_b]}{[\text{Ru}]} \quad (\text{S3})$$

Where  $[\text{Ru}_f]$  and  $[\text{Ru}_b]$  are the concentration of free and bound  $[\text{Ru}(\text{bpy})_2(\text{dpqp})]^{2+}$  respectively. We define now that the sum of the free and bound species is equal to the total concentration:

$$[\text{Ru}] = [\text{Ru}_f] + [\text{Ru}_b] \quad (\text{S4})$$

$$[\text{A}\beta] = [\text{A}\beta_f] + [\text{A}\beta_b] \quad (\text{S5})$$

where  $[\text{Ru}]$  and  $[\text{A}\beta]$  is the total concentration of  $[\text{Ru}(\text{bpy})_2(\text{dpqp})]^{2+}$  and  $\text{A}\beta$  binding sites respectively. We will now solve equation S1 in terms of  $[\text{Ru}]$  and  $[\text{A}\beta]$ . Rearranging eq S1 we get:

$$r = (1 - f_b) r_f + f_b r_b \quad (\text{S6})$$

$$r = r_f + f_b(r_b - r_f) \quad (S7)$$

And taking  $f_b$  from equation S3 gives:

$$r = r_f + (r_b - r_f) \frac{[Ru_b]}{[Ru]} \quad (S8)$$

The equilibrium dissociation constant can be calculated by:

$$Ru \cdots A\beta \rightleftharpoons Ru_f + A\beta_f \quad (S9)$$

Where  $Ru_f$  represents free  $[Ru(bpy)_2(dpqp)]^{2+}$  and  $A\beta_f$  represents a free  $A\beta$  oligomer binding site.  $Ru \cdots A\beta$  is the  $[Ru(bpy)_2(dpqp)]^{2+}$  bound to an  $A\beta$  binding site ( $[Ru \cdots A\beta] = [Ru_b] = [A\beta_b]$ ).

The equilibrium dissociation constant ( $k_d$ ) can be written as:

$$k_d = \frac{[Ru_f][A\beta_f]}{[Ru \cdots A\beta]} = \frac{[Ru_f][A\beta_f]}{[Ru_b]} \quad (S10)$$

Rearranging this equation gives

$$[Ru_b]k_d = [Ru_f][A\beta_f] \quad (S11)$$

Using equations S4 and S5 to substitute for  $[Ru_f]$  and  $[A\beta_f]$ :

$$[Ru_b]k_d = ([Ru] - [Ru_b])([A\beta] - [Ru_b]) \quad (S12)$$

$$[Ru_b]^2 - (k_d + [A\beta] + [Ru])[Ru_b] + [A\beta][Ru] = 0 \quad (S13)$$

Solving this quadratic equation gives:

$$[Ru_b] = \frac{(k_d + [Ru] + [A\beta]) - \sqrt{(k_d + [Ru] + [A\beta])^2 - 4[A\beta][Ru]}}{2} \quad (S14)$$

Substituting eq S14 in eq S8 results in:

$$r = r_f + \frac{r_b - r_f}{2[Ru]} \left( (k_d + [Ru] + [A\beta]) - \sqrt{(k_d + [Ru] + [A\beta])^2 - 4[A\beta][Ru]} \right) \quad (S15)$$

$[A\beta]$  is not the total concentration of  $A\beta$ , but rather the total concentration of  $[A\beta]$  binding sites. To relate the total concentration of  $A\beta$  to the total concentration of  $A\beta$  binding sites we made the assumption that binding sites occurs only in oligomers (rather than in unstructured random coil monomers) and that there is one binding site per oligomer (one site model). The concentration of  $A\beta$  forming oligomers is then  $[A\beta]_T - [A\beta]_m$ , where  $[A\beta]_m$  is the concentration of monomers in solution and  $[A\beta]_T$  is the total concentration of  $A\beta$ . Finally, the concentration of oligomer binding sites can be estimated by dividing by an approximate number of  $A\beta$  units ( $n$ ) forming oligomers. The final equation is then:

$$r = r_f + \frac{r_b - r_f}{2[Ru]} \left( \left( k_d + [Ru] + \frac{[A\beta]_T - [A\beta]_m}{n} \right) - \sqrt{\left( k_d + [Ru] + \frac{[A\beta]_T - [A\beta]_m}{n} \right)^2 - 4 \frac{[A\beta]_T - [A\beta]_m}{n} [Ru]} \right) \quad (S16)$$

where  $\frac{[A\beta]_T - [A\beta]_m}{n}$  is the approximate concentration of A $\beta$  oligomers.
